# Supplementary material for: Highly active chromium-based selective ethylene tri-/tetramerization catalysts supported by PNPO phosphazane ligands
Source: Royal Society of Chemistry journal article supplement (doi:10.1039/c5dt00801h), 2015-01-01

**Electronic Supplementary Information for**  
**Highly Active Chromium-Base Selective Ethylene Tri-/Tetramerization**  
**Catalysts Supported by PNPO Phosphazane Ligands**

Yusheng Zhou, Hongfei Wu, Sheng Xu, Xuejun Zhang, Min Shi, and Jun Zhang\*

**General Information:** NMR spectra were recorded by using a Bruker 400 MHz spectrometer. Chemical shifts are reported in ppm from tetramethylsilane with the solvent resonance as the internal standard ( $^1\text{H}$  NMR  $\text{CDCl}_3$ : 7.26 ppm ;  $^{13}\text{C}$  NMR  $\text{CDCl}_3$ : 77.0 ppm).

**NMR Spectra:**

Ligand **L**<sup>1</sup>

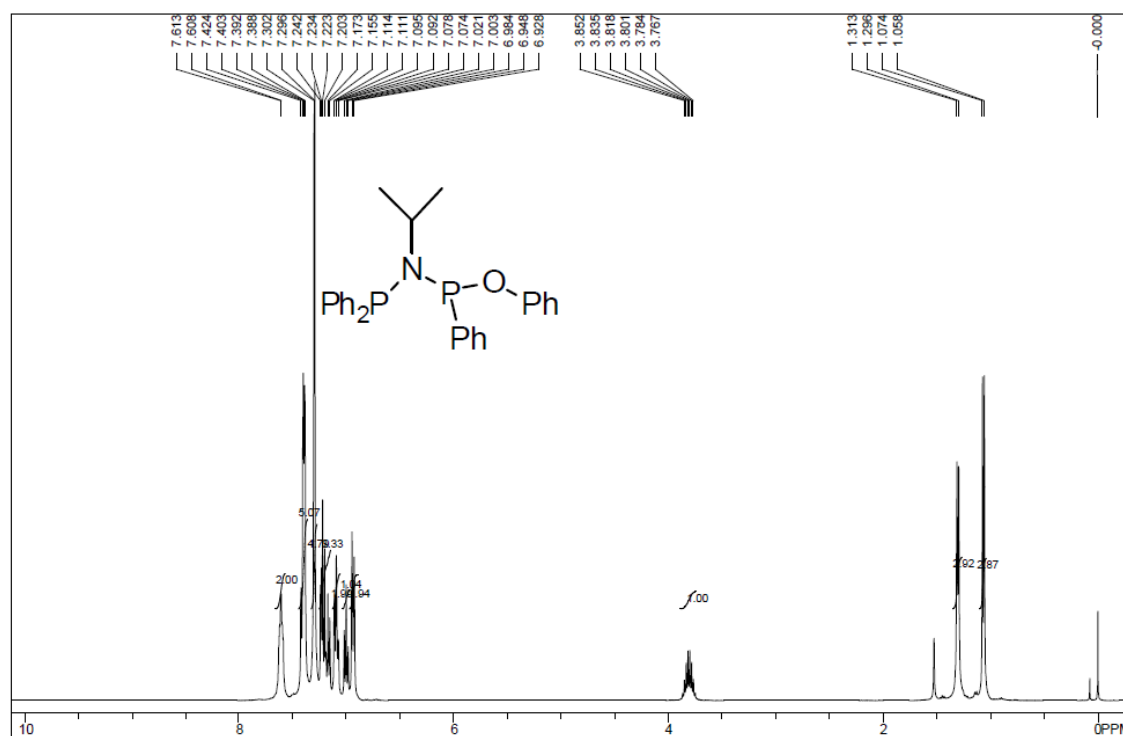

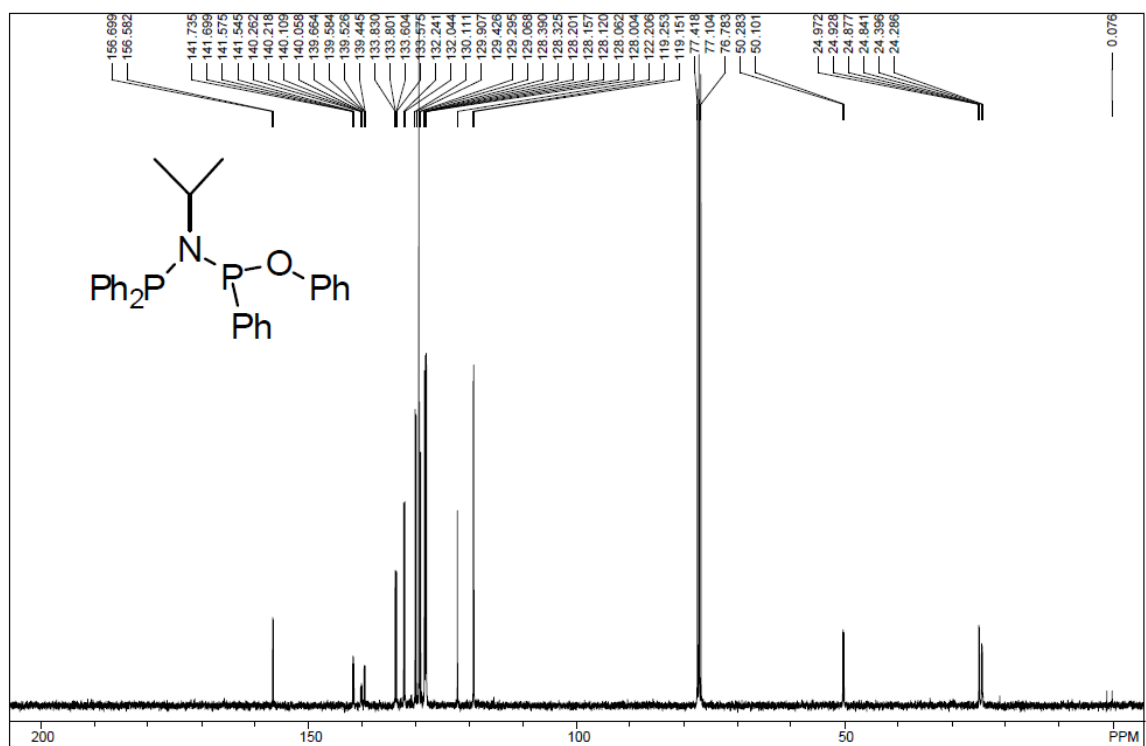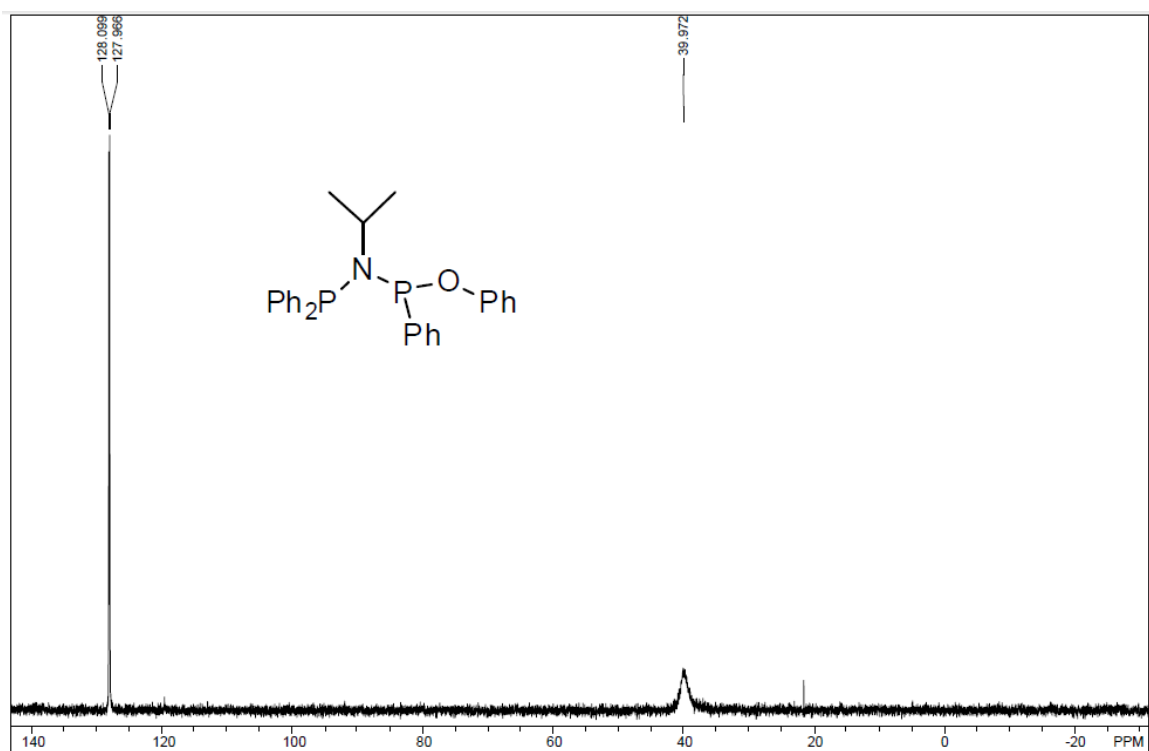

# Ligand L<sup>3</sup>

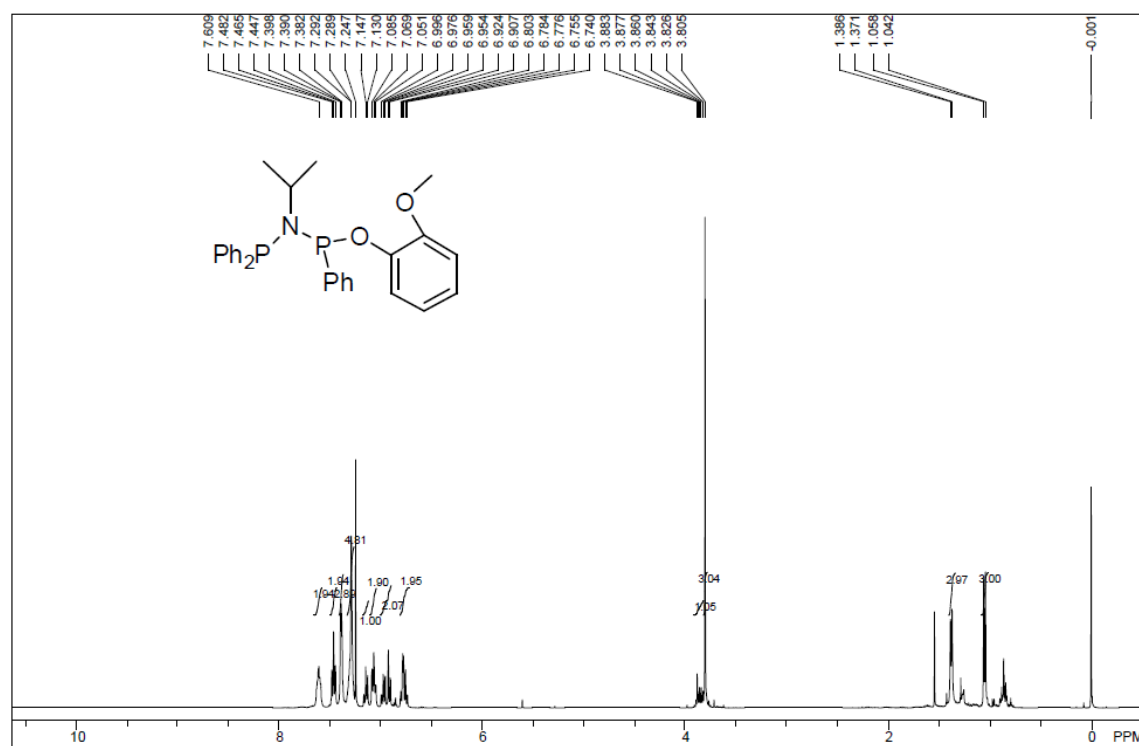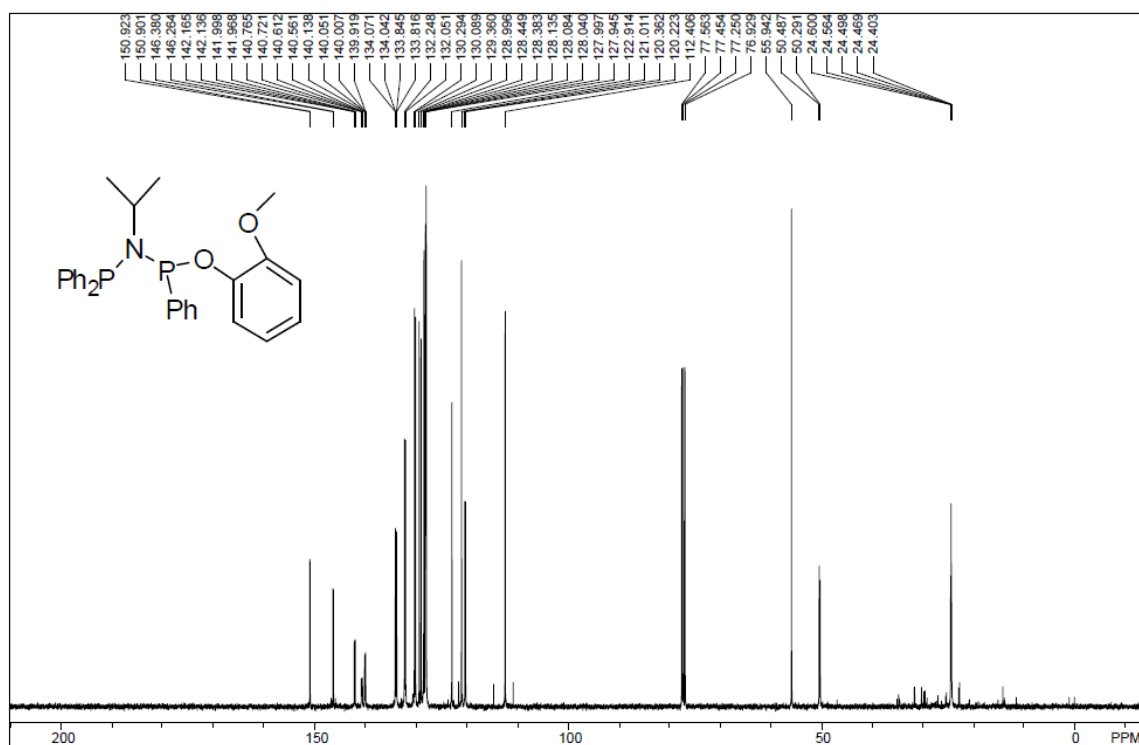

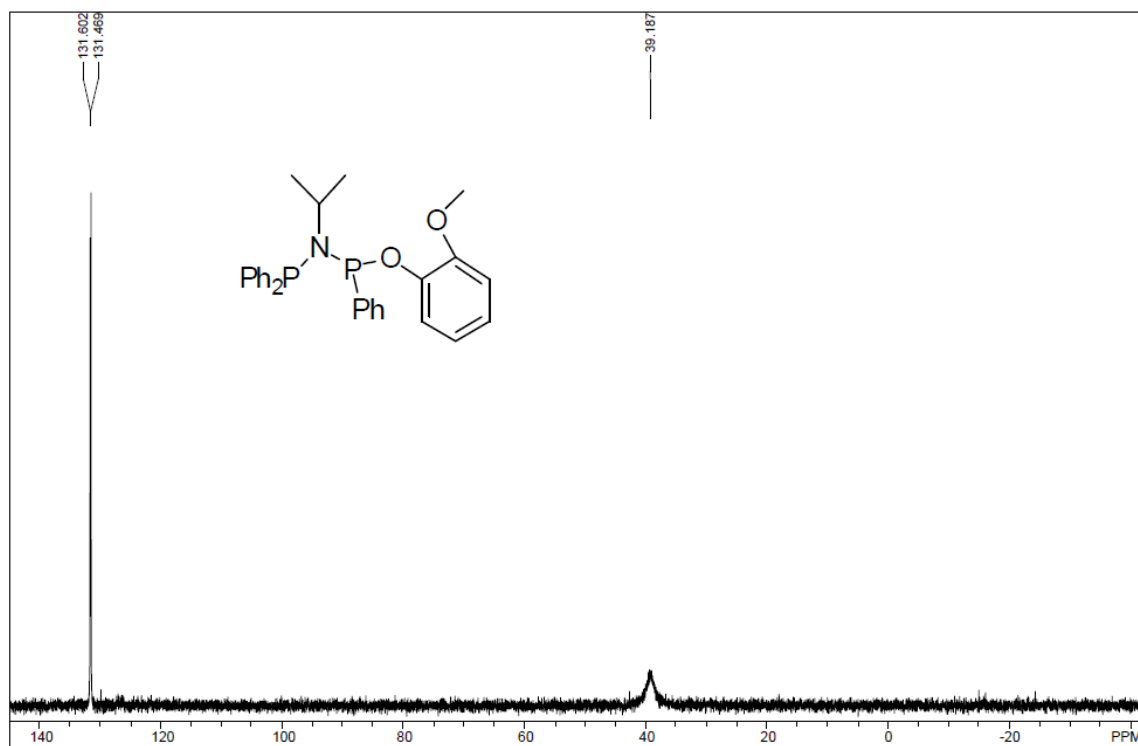

Ligand L<sup>4</sup>

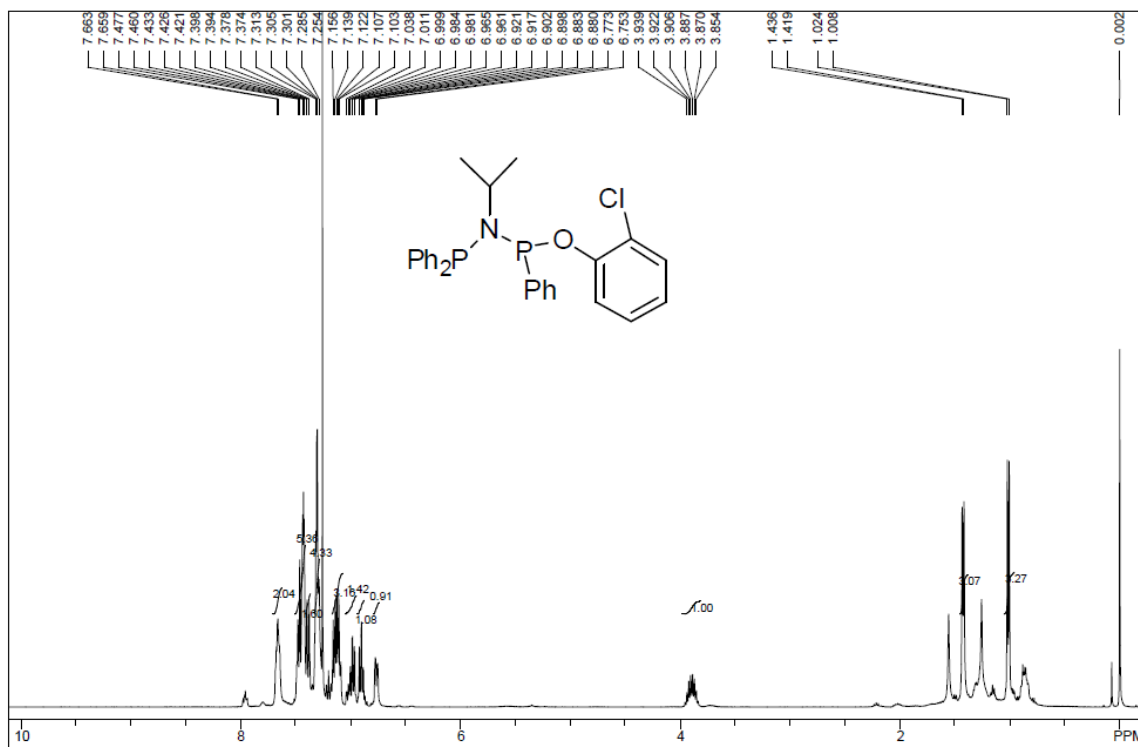

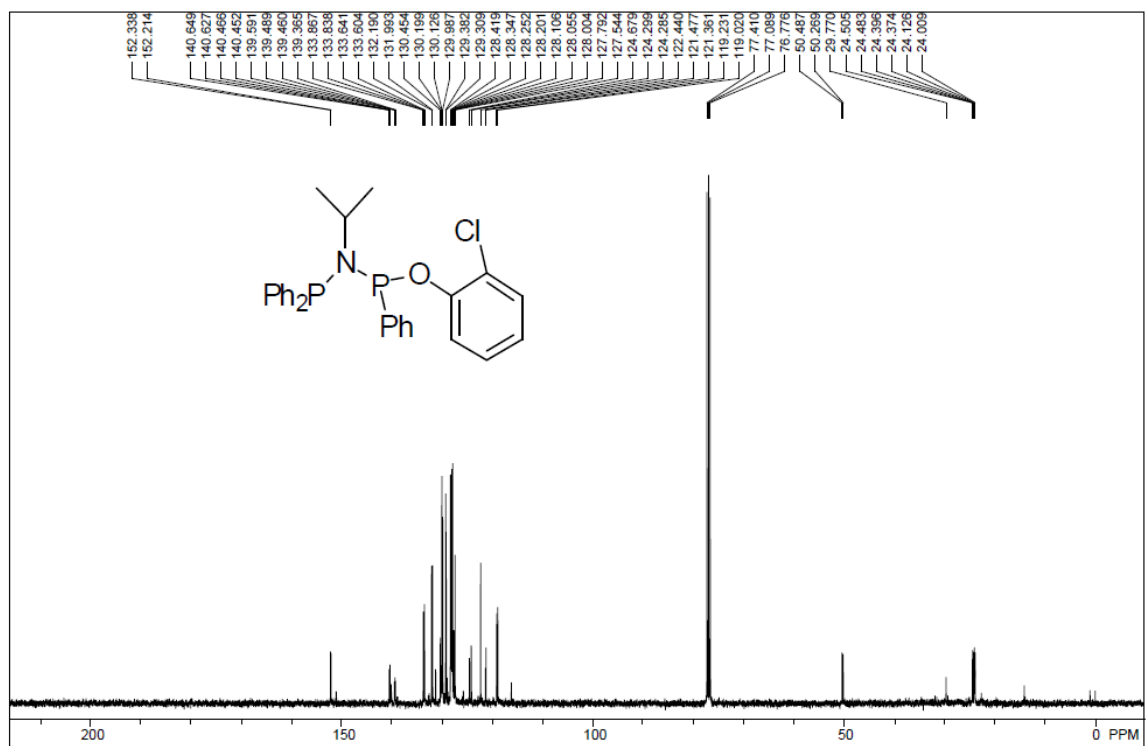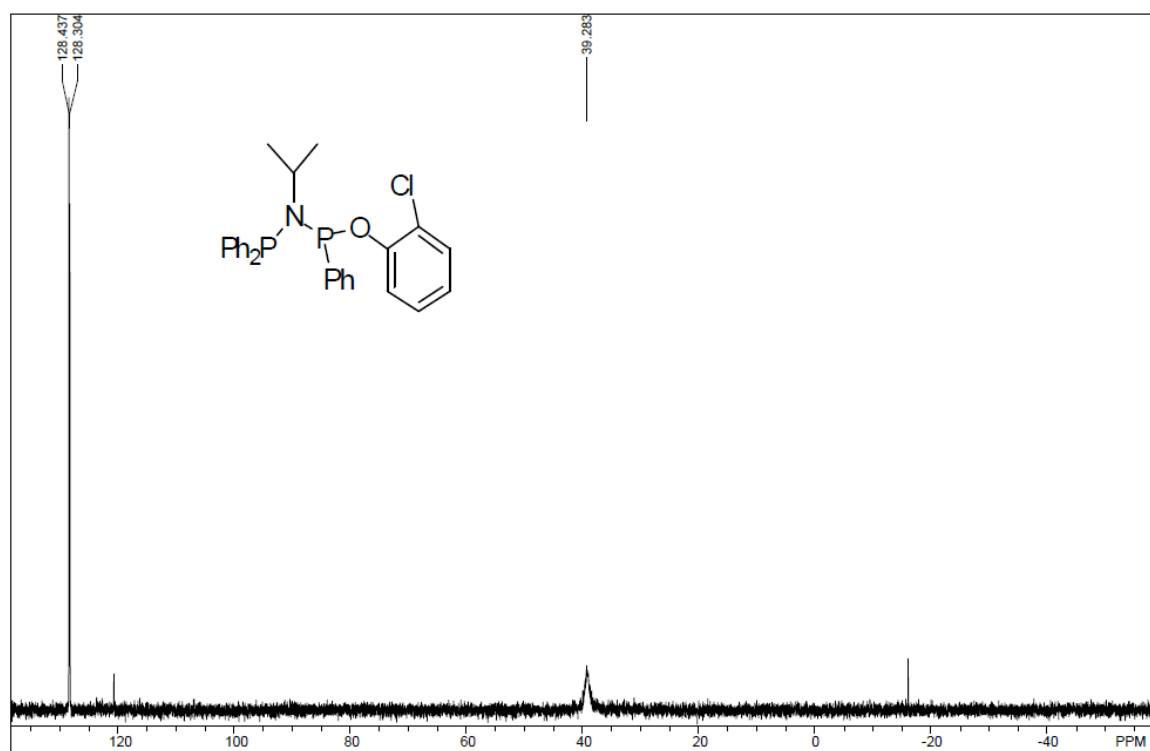

# Ligand L<sup>5</sup>

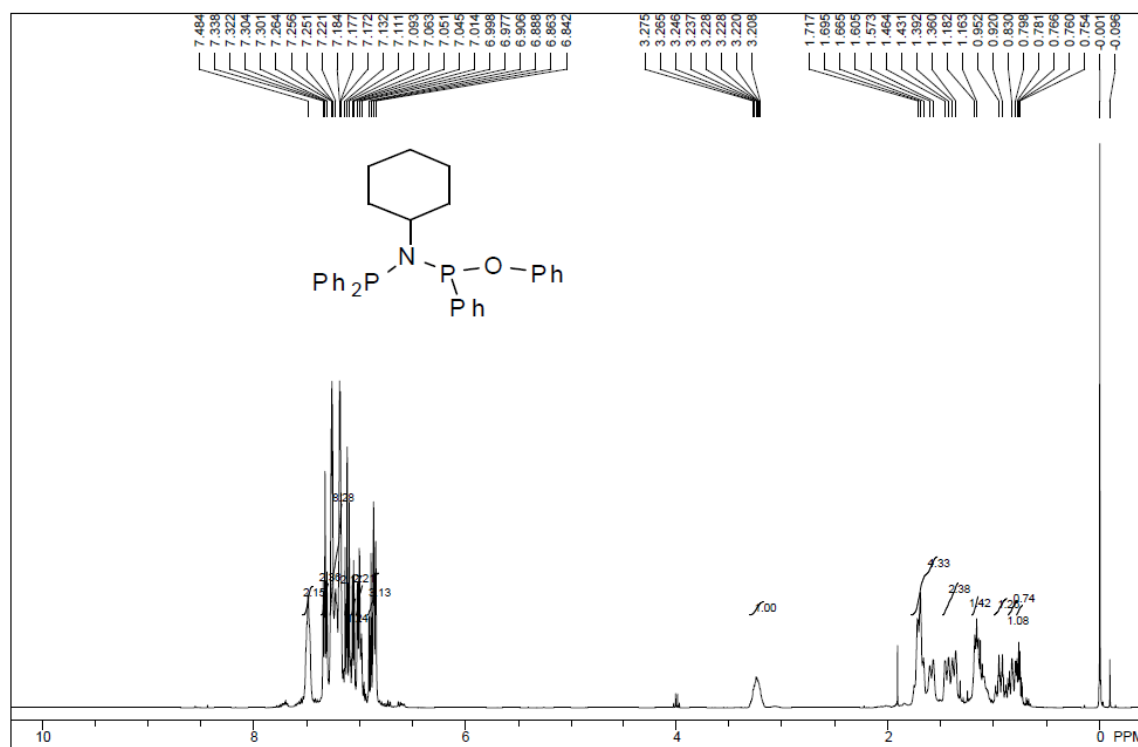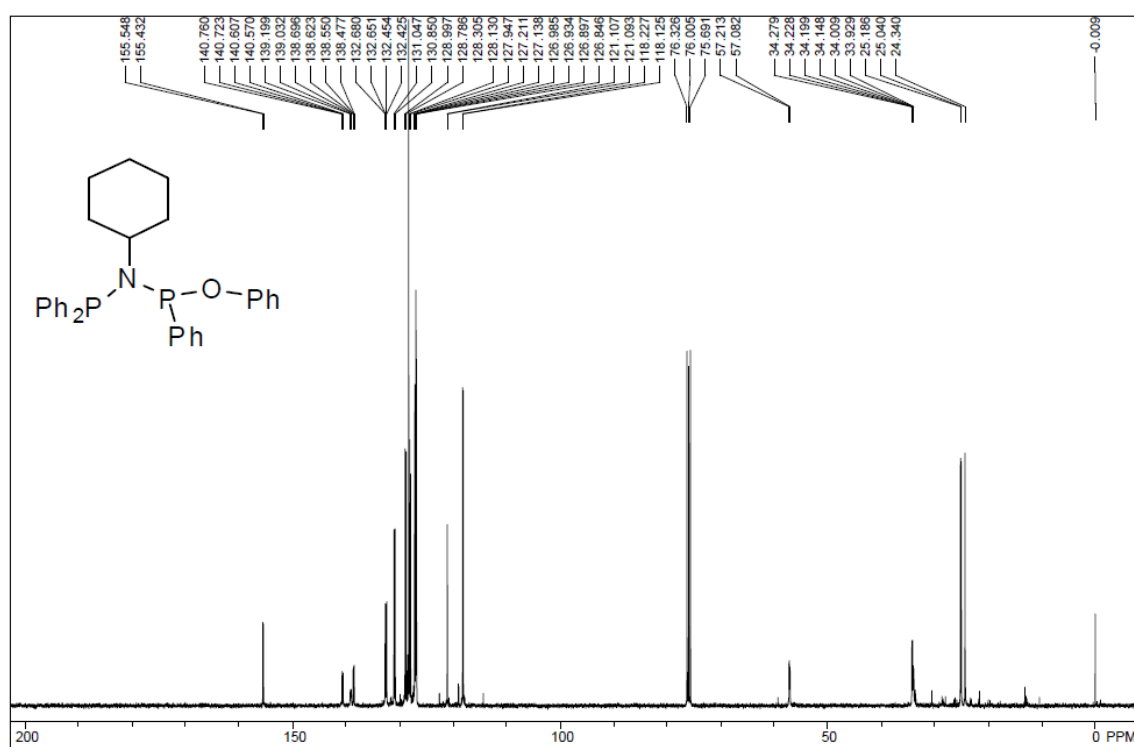

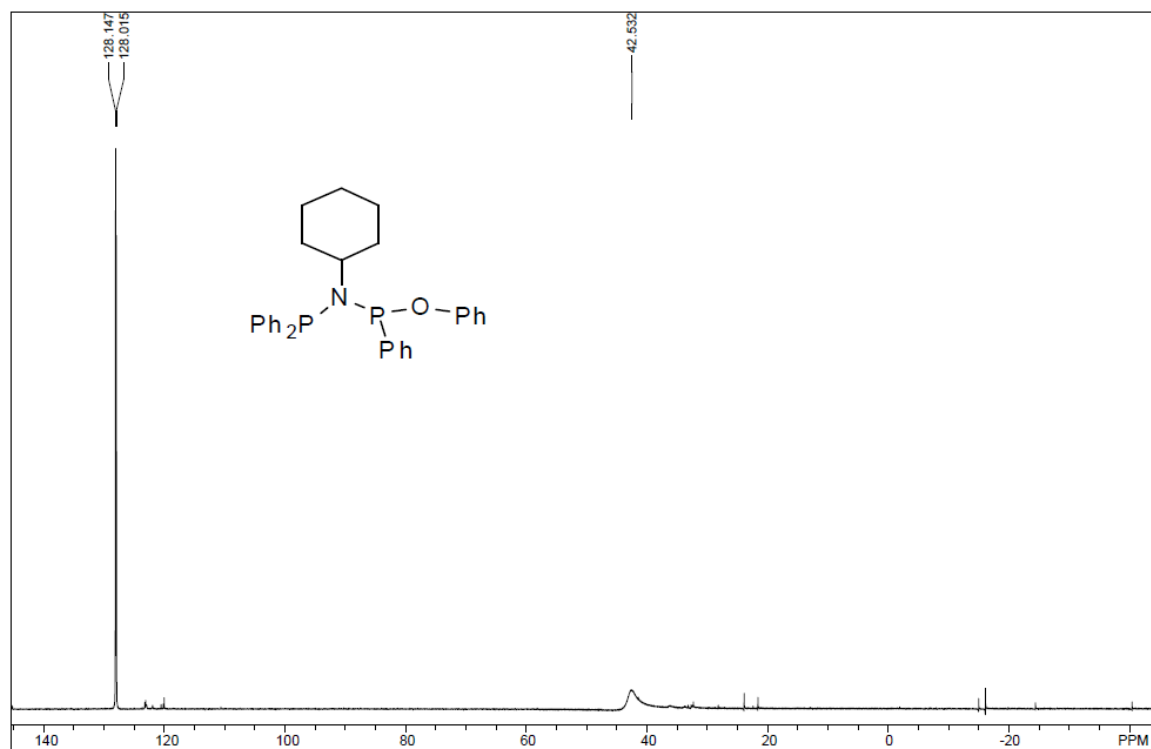

Supplement: c5dt00801h1.pdf [file c5dt00801h1.pdf]
